# Supplementary material for: Multivariable fractional polynomial interaction to investigate continuous effect modifiers in a meta-analysis on higher versus lower PEEP for patients with ARDS
Source: PubMed Central journal article supplement — BMJ Open. 2016 Sep 8;6(9):e011148. doi: 10.1136/bmjopen-2016-011148 (PMC5020750; doi:10.1136/bmjopen-2016-011148), 2016-09-08
Supplement: bmjopen-2016-011148supp_figures.pdf [file bmjopen-2016-011148supp_figures.pdf]

## Supplementary figures

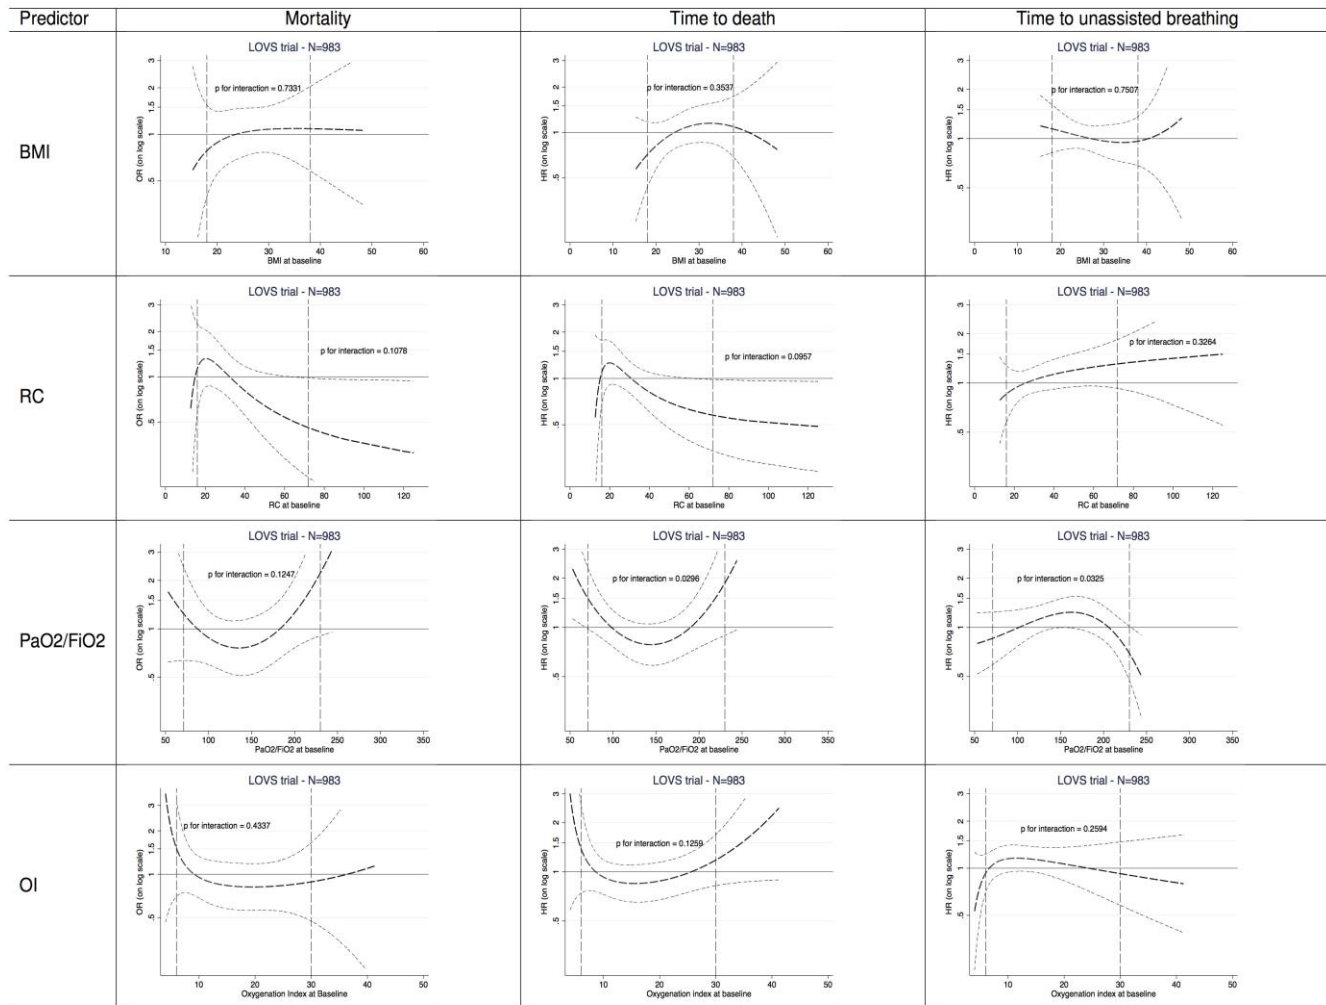

**APPENDIX FIGURE 1:** TEFs of each predictor-outcome pair. The vertical dashed lines indicate the the 5% and 95% centile of the data of the continuous predictors; the horizontal line at the OR or HR of 1 denotes equivalence of treatment effects, thus a TEF parallel to the horizontal line indicates no treatment interaction. For the outcomes 60 days in hospital mortality and time to death values beneath this line indicate that higher PEEP is more effective than lower PEEP. For the outcome time to unassisted breathing, it is the other way round. Abbreviations: CI=confidence interval; BMI=body mass index; HR=hazard ratio; OR=odds ratio; OI=Oxygenation index; PaO2/FiO2=PaO2/FiO2 ratio; PEEP=Positive endexpiratory pressure; RC=Respiratory compliance; TEF=Treatment effect function

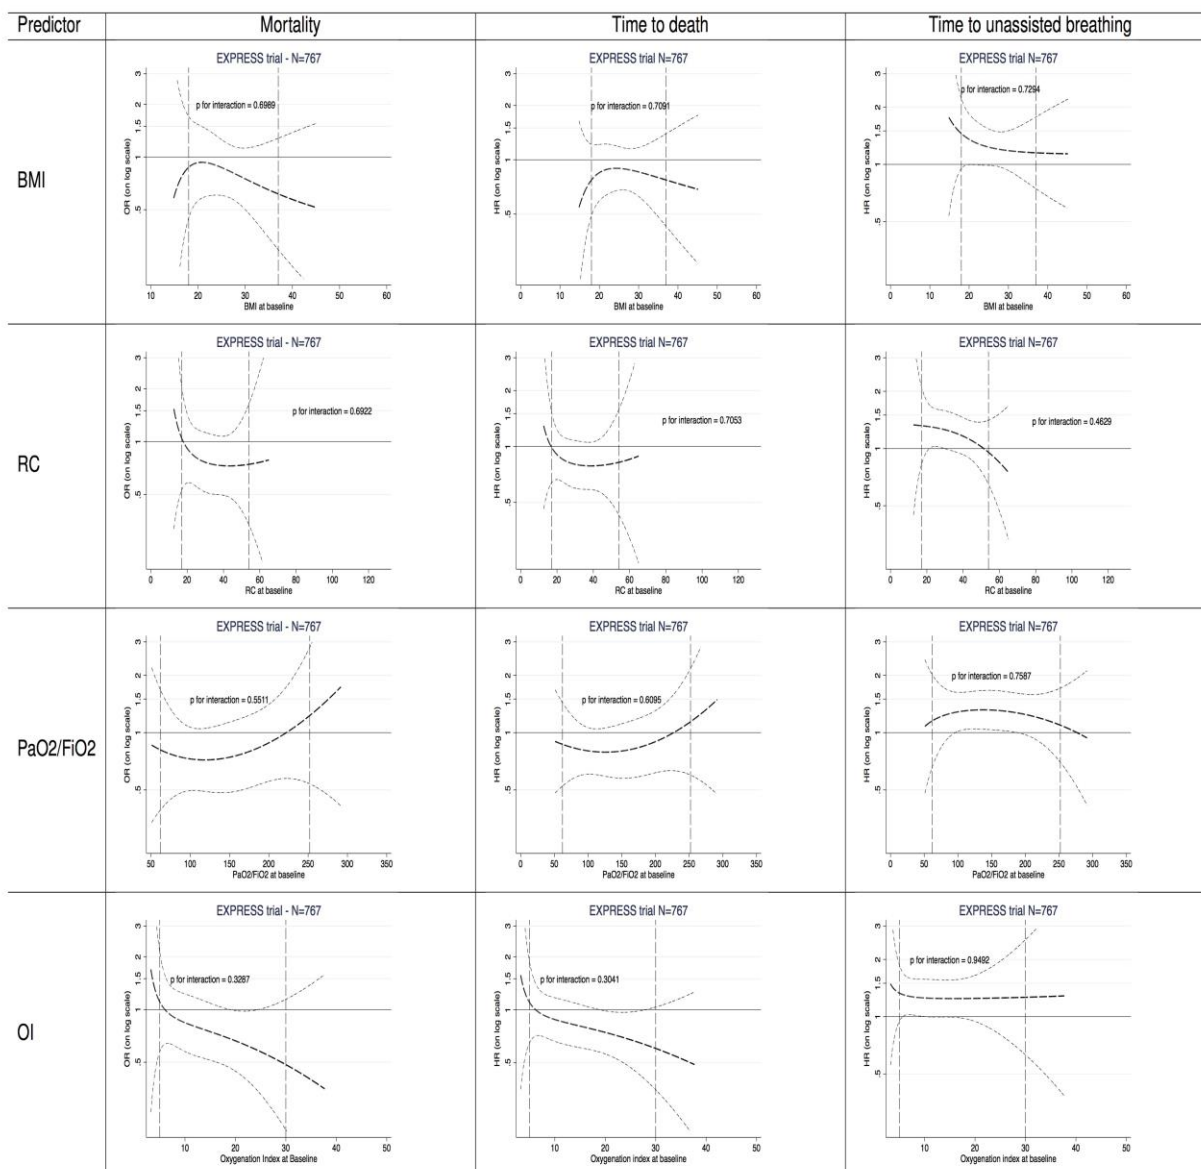

**APPENDIX FIGURE 2:** TEFs of each predictor-outcome pair. The vertical dashed lines indicate the 5% and 95% centile of the continuous predictors; the horizontal line at the OR or HR of 1 denotes equivalence of treatment effects, thus a TEF parallel to the horizontal line indicates no treatment interaction. For the outcomes 60 days in hospital mortality and time to death values beneath this line indicate that higher PEEP is more effective than lower PEEP. For the outcome time to unassisted breathing, it is the other way round. Abbreviations: CI=confidence interval; BMI=body mass index; HR=hazard ratio; OR=odds ratio; OI=Oxygenation index; PaO2/FiO2=PaO2/FiO2 ratio; PEEP=Positive endexpiratory pressure; RC=Respiratory compliance; TEF=Treatment effect function

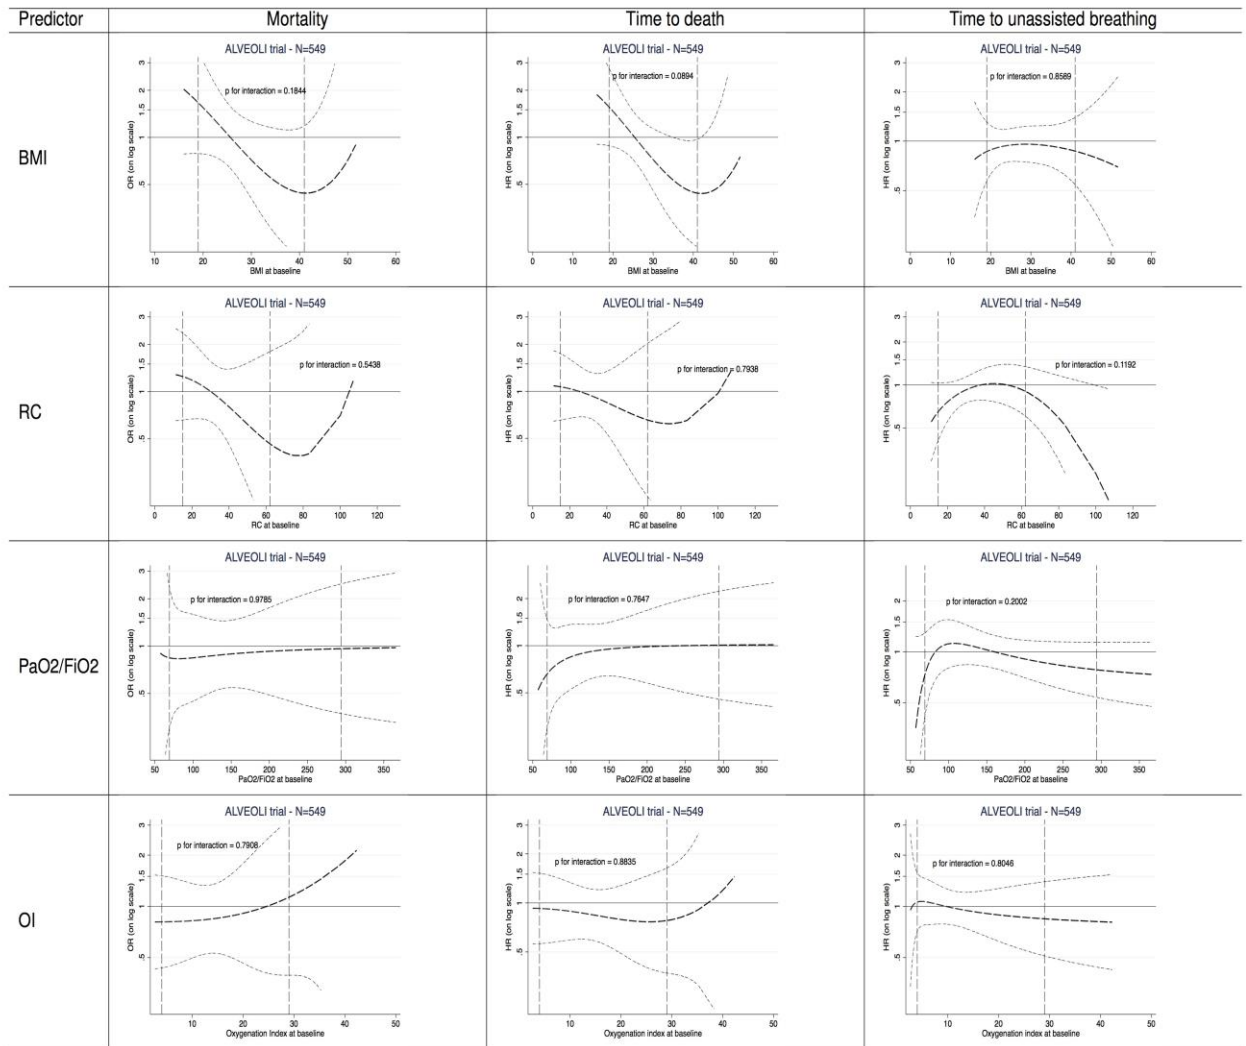

**APPENDIX FIGURE 3:** TEFs of each predictor-outcome pair. The vertical dashed lines indicate the 5% and 95% centile of the continuous predictors; the horizontal line at the OR or HR of 1 denotes equivalence of treatment effects, thus a TEF parallel to the horizontal line indicates no treatment interaction. For the outcomes 60 days in hospital mortality and time to death values beneath this line indicate that higher PEEP is more effective than lower PEEP. For the outcome time to unassisted breathing, it is the other way round. Abbreviations: CI=confidence interval; BMI=body mass index; HR=hazard ratio; OR=odds ratio; OI=Oxygenation index; PaO2/FiO2=PaO2/FiO2 ratio; PEEP=Positive endexpiratory pressure; RC=Respiratory compliance; TEF=Treatment effect function
