# Supplementary material for: Multivariable fractional polynomial interaction to investigate continuous effect modifiers in a meta-analysis on higher versus lower PEEP for patients with ARDS
Source: PubMed Central journal article supplement — BMJ Open. 2016 Sep 8;6(9):e011148. doi: 10.1136/bmjopen-2016-011148 (PMC5020750; doi:10.1136/bmjopen-2016-011148), 2016-09-08
Supplement: bmjopen-2016-011148supp_tables.pdf [file bmjopen-2016-011148supp_tables.pdf]

## APPENDIX

### Description of the multiple imputations

For the imputation of missing values, we used multiple imputations by chained equations. This technique uses switching regression, which is an iterative multivariable regression technique and implemented in the STATA software with the ice command (Royston P. 2005. Multiple imputation of missing values: update. *Stata Journal* 5: 188-201; Royston P. 2005. Multiple imputation of missing values: update of ice. *Stata Journal* 5: 527-536.; Royston P. 2007. Multiple imputation of missing values: further update of ice, with an emphasis on interval censoring. *Stata Journal* 7: 445-464.).

The following 29 variables were considered in the chained equations to impute missing values: BMI (log-transformed), respiratory compliance, oxygenation index (log-transformed), adjusted PaO<sub>2</sub>/FiO<sub>2</sub> (log-transformed), probability of death (inverse normal transformed), respiratory rate, plateau pressure at baseline, minute ventilation at baseline (log-transformed), tidal volume at baseline (log-transformed), age, number of days on ICU before randomization, number of days of the ventilator, number of days until death in hospital, number of additional failed organs at baseline, set baseline PEEP, direct lung injury at baseline, presence of ARDS, gender, presence of severe sepsis, trial number, censoring code for death, censoring code for coming off the ventilator, group assignment, rescue therapy, death after rescue therapy, therapy with muscle relaxation, therapy with vasopressor support, therapy with steroids. According to the nature of the variable, linear regression, logistic regression or ordinal regression was used in the respective equations. We used the first imputed dataset for our analyses.





**APPENDIX TABLE 3: EXPRESS trial (N=767).** Model parameters for each modifier-outcome pair adjusted for age, sepsis and predicted probability of death. FP2 denotes the fractional polynomial function for interaction with its two chosen power terms in brackets. All values are rounded to 2 decimals. BMI = body mass index, CI = confidence interval, FP = fractional polynomial, OI = oxygenation index, OR = odds ratio, P = P value, RC = respiratory compliance, SE = standard error

|           | 60 days in hospital mortality |              |       |        |             | Time to death         |              |       |        |             | Time to unassisted breathing |              |        |        |             |
|-----------|-------------------------------|--------------|-------|--------|-------------|-----------------------|--------------|-------|--------|-------------|------------------------------|--------------|--------|--------|-------------|
|           |                               | OR           | SE    | P      | 95% CI      |                       | HR           | SE    | P      | 95% CI      |                              | HR           | SE     | P      | 95% CI      |
| BMI       | Age                           | 1.03         | 0.006 | <0.001 | 1.02 – 1.05 | Age                   | 1.02         | 0.005 | <0.001 | 1.02 – 1.03 | Age                          | 0.99         | 0.003  | <0.001 | 0.98 – 0.99 |
|           | Severe sepsis                 | 0.92         | 0.175 | 0.664  | 0.63 – 1.34 | Severe sepsis         | 1.00         | 0.148 | 0.954  | 0.74 – 1.33 | Severe sepsis                | 1.05         | 0.117  | 0.672  | 0.84 – 1.30 |
|           | Probability of death          | 1.02         | 0.003 | <0.001 | 1.01 – 1.02 | Probability of death  | 1.01         | 0.002 | <0.001 | 1.01 – 1.02 | Probability of death         | 0.99         | 0.002  | 0.048  | 0.99 – 1.00 |
|           | BMI interaction               | FP2 (-2, -2) |       |        |             | BMI interaction       | FP2 (-2, -1) |       |        |             | BMI interaction              | FP2 (-2, -2) |        |        |             |
|           |                               | OR           | SE    | P      | 95% CI      |                       | HR           | SE    | P      | 95% CI      |                              | HR           | SE     | P      | 95% CI      |
| RC        | Age                           | 1.03         | 0.006 | <0.001 | 1.02 – 1.05 | Age                   | 1.02         | 0.005 | <0.001 | 1.01 – 1.03 | Age                          | 0.99         | 0.003  | <0.001 | 0.98 – 0.99 |
|           | Severe sepsis                 | 0.98         | 0.186 | 0.916  | 0.68 – 1.42 | Severe sepsis         | 1.02         | 0.153 | 0.876  | 0.76 – 1.37 | Severe sepsis                | 1.09         | 0.118  | 0.441  | 0.88 – 1.35 |
|           | Probability of death          | 1.02         | .003  | <0.001 | 1.01 – 1.02 | Probability of death  | 1.01         | 0.003 | <0.001 | 1.01 – 1.02 | Probability of death         | 0.99         | 0.002  | 0.020  | 0.99 – 1.00 |
|           | RC interaction                | FP2 (-2, 3)  |       |        |             | RC interaction        | FP2 (-2, 3)  |       |        |             | RC interaction               | FP2 (-2, 3)  |        |        |             |
|           |                               | OR           | SE    | P      | 95% CI      |                       | HR           | SE    | P      | 95% CI      |                              | HR           | SE     | P      | 95% CI      |
| PaO2/FiO2 | Age                           | 1.03         | 0.006 | <0.001 | 1.02 – 1.04 | Age                   | 1.02         | 0.005 | <0.001 | 1.01 – 1.03 | Age                          | 0.99         | 0.003  | <0.001 | 0.98 – 0.99 |
|           | Severe sepsis                 | 1.01         | 0.192 | 0.948  | 0.70 – 1.47 | Severe sepsis         | 1.06         | 0.157 | 0.701  | 0.79 – 1.42 | Severe sepsis                | 1.09         | 0.118  | 0.441  | 0.88 – 1.35 |
|           | Probability of death          | 1.01         | 0.003 | <0.001 | 1.01 – 1.02 | Probability of death  | 1.01         | 0.003 | <0.001 | 1.01 – 1.02 | Probability of death         | 0.99         | 0.002  | 0.020  | 0.99 – 1.00 |
|           | PaO2/FiO2 interaction         | FP2 (0.5, 2) |       |        |             | PaO2/FiO2 interaction | FP2 (1, 2)   |       |        |             | PaO2/FiO2 interaction        | FP2 (-2, 3)  |        |        |             |
|           |                               | OR           | SE    | P      | 95% CI      |                       | HR           | SE    | P      | 95% CI      |                              | HR           | SE     | P      | 95% CI      |
| OI        | Age                           | 1.03         | 0.006 | <0.001 | 1.02 – 1.05 | Age                   | 1.02         | 0.005 | <0.001 | 1.02 – 1.03 | Age                          | 0.99         | 0.003  | <0.001 | 0.99 – 1.00 |
|           | Severe sepsis                 | .99          | 0.190 | 0.959  | 0.68 – 1.44 | Severe sepsis         | 1.04         | 0.154 | 0.817  | 0.77 – 1.38 | Severe sepsis                | 1.19         | 0.1211 | 0.344  | 0.90 – 1.37 |
|           | Probability of death          | 1.01         | 0.003 | <0.001 | 1.01 – 1.02 | Probability of death  | 1.01         | 0.003 | <0.001 | 1.01 – 1.02 | Probability of death         | 0.99         | 0.002  | 0.077  | 0.99 – 1.00 |
|           | OI interaction                | FP2 (-2, 2)  |       |        |             | OI interaction        | FP2 (-2, 2)  |       |        |             | OI interaction               | FP2 (-2, 2)  |        |        |             |
|           |                               | OR           | SE    | P      | 95% CI      |                       | HR           | SE    | P      | 95% CI      |                              | HR           | SE     | P      | 95% CI      |

**APPENDIX TABLE 4: ALVEOLI trial (N=549).** Model parameters for each modifier-outcome pair adjusted for age, sepsis and predicted probability of death. FP2 denotes the fractional polynomial function for interaction with its two chosen power terms in brackets. All values are rounded to 2 decimals. BMI = body mass index, CI = confidence interval, FP = fractional polynomial, OI = oxygenation index, OR = odds ratio, P = P value, RC = respiratory compliance, SE = standard error

|           | 60 days in hospital mortality |              |        |        |             | Time to death         |              |       |        |             | Time to unassisted breathing |              |       |        |             |
|-----------|-------------------------------|--------------|--------|--------|-------------|-----------------------|--------------|-------|--------|-------------|------------------------------|--------------|-------|--------|-------------|
|           |                               | OR           | SE     | P      | 95% CI      |                       | HR           | SE    | P      | 95% CI      |                              | HR           | SE    | P      | 95% CI      |
| BMI       | Age                           | 1.03         | 0.007  | <0.001 | 1.02 – 1.05 | Age                   | 1.03         | 0.005 | <0.001 | 1.02 – 1.04 | Age                          | 0.99         | 0.003 | 0.227  | 0.99 – 1.00 |
|           | Severe sepsis                 | 1.00         | 0.2250 | 0.996  | 1.03 – 1.06 | Severe sepsis         | 1.09         | 0.191 | 0.605  | 0.78 – 1.54 | Severe sepsis                | 0.95         | 0.104 | 0.620  | 0.76 – 1.17 |
|           | Probability of death          | 1.04         | 0.0060 | <0.001 | 1.03 – 1.06 | Probability of death  | 1.04         | 0.005 | <0.001 | 1.03 – 1.05 | Probability of death         | 0.99         | 0.003 | <0.001 | 0.98 – 0.99 |
|           | BMI interaction               | FP2 (3, 3)   |        |        |             | BMI interaction       | FP2 (3, 3)   |       |        |             | BMI interaction              | FP2 (-2, 3)  |       |        |             |
|           |                               | OR           | SE     | P      | 95% CI      |                       | HR           | SE    | P      | 95% CI      |                              | HR           | SE    | P      | 95% CI      |
| RC        | Age                           | 1.03         | 0.007  | <0.001 | 1.02 – 1.05 | Age                   | 1.03         | 0.006 | <0.001 | 1.02 – 1.04 | Age                          | 0.99         | 0.003 | 0.076  | 0.99 – 1.00 |
|           | Severe sepsis                 | 0.97         | 0.218  | 0.889  | 0.62 – 1.51 | Severe sepsis         | 1.06         | 0.185 | 0.727  | 0.76 – 1.50 | Severe sepsis                | 1.00         | 0.111 | 0.981  | 0.81 – 1.25 |
|           | Probability of death          | 1.04         | 0.006  | <0.001 | 1.03 – 1.06 | Probability of death  | 1.04         | 0.005 | <0.001 | 1.03 – 1.04 | Probability of death         | 0.99         | 0.003 | <0.001 | 0.98 – 0.99 |
|           | RC interaction                | FP2 (3, 3)   |        |        |             | RC interaction        | FP2 (3, 3)   |       |        |             | RC interaction               | FP2 (0.5, 3) |       |        |             |
|           |                               | OR           | SE     | P      | 95% CI      |                       | HR           | SE    | P      | 95% CI      |                              | HR           | SE    | P      | 95% CI      |
| PaO2/FiO2 | Age                           | 1.03         | 0.007  | <0.001 | 1.02 – 1.05 | Age                   | 1.03         | 0.006 | <0.001 | 1.02 – 1.04 | Age                          | 1.00         | 0.003 | 0.278  | 0.99 – 1.00 |
|           | Severe sepsis                 | 0.98         | 0.223  | 0.923  | 0.63 – 1.53 | Severe sepsis         | 1.09         | 0.191 | 0.636  | 0.77 – 1.53 | Severe sepsis                | 0.98         | 0.108 | 0.863  | 0.79 – 1.22 |
|           | Probability of death          | 1.04         | 0.006  | <0.001 | 1.03 – 1.05 | Probability of death  | 1.03         | 0.005 | <0.001 | 1.02 – 1.04 | Probability of death         | 0.99         | 0.003 | <0.001 | 0.98 – 0.99 |
|           | PaO2/FiO2 interaction         | FP2 (-2, -2) |        |        |             | PaO2/FiO2 interaction | FP2 (-2, -2) |       |        |             | PaO2/FiO2 interaction        | FP2 (-2, -2) |       |        |             |
|           |                               | OR           | SE     | P      | 95% CI      |                       | HR           | SE    | P      | 95% CI      |                              | HR           | SE    | P      | 95% CI      |
| OI        | Age                           | 1.04         | 0.007  | <0.001 | 1.02 – 1.05 | Age                   | 1.03         | 0.006 | <0.001 | 1.02 – 1.04 | Age                          | 0.99         | 0.003 | 0.034  | 0.99 – 1.00 |
|           | Severe sepsis                 | 0.91         | 0.210  | 0.681  | 0.58 – 1.43 | Severe sepsis         | 1.03         | 0.179 | 0.882  | 0.73 – 1.44 | Severe sepsis                | 1.01         | 0.112 | 0.898  | 0.82 – 1.26 |
|           | Probability of death          | 1.04         | 0.006  | <0.001 | 1.03 – 1.05 | Probability of death  | 1.03         | 0.005 | <0.001 | 1.02 – 1.04 | Probability of death         | 0.99         | 0.003 | <0.001 | 0.98 – 0.99 |
|           | OI interaction                | FP2 (3, 3)   |        |        |             | OI interaction        | FP2 (3, 3)   |       |        |             | OI interaction               | FP2 (-1, -1) |       |        |             |
|           |                               | OR           | SE     | P      | 95% CI      |                       | HR           | SE    | P      | 95% CI      |                              | HR           | SE    | P      | 95% CI      |
